# Supplementary material for: Establishing Transgenic Schistosomes
Source: PubMed Central journal article supplement (PMC3166048; doi:10.1371/journal.pntd.0001230), 2011-08-30
Supplement: pntd.0001230.s001.pdf [file pntd.0001230.s001.pdf]

**Alternative Language Abstract S1.** Translation of Abstract into Thai by Sutas Suttiprapa.

## การสร้างพยาธิซิสโตโซมแปลงพันธุ

**Victoria H. Mann<sup>1,\*</sup>, Sutas Suttiprapa<sup>1,\*</sup>, Gabriel Rinaldi<sup>1,2,\*</sup>, Paul J. Brindley<sup>1</sup>**

1 Department of Microbiology, Immunology & Tropical Medicine, George Washington University Medical Center, Washington, DC 20037 USA

2 Departamento de Genética, Facultad de Medicina, Universidad de la República, (UDELAR), Montevideo, Uruguay

\* Equal contribution

### บทคัดย่อ

พิมพ์เขียวของจีโนมของพยาธิซิสโตโซม (schistosome) ชนิด *Schistosoma japonicum* และ *S. mansoni* ขณะนี้สามารถนำมาใช้ประโยชน์ได้แล้ว ลำดับดีเอ็นเอของพยาธิซิสโตโซมประกอบด้วยยีนที่สามารถแปรรหัสเป็นโปรตีนได้ประมาณ 13,000 ชนิด ซึ่งมีส่วนน้อยของยีนเหล่านี้เท่านั้นที่ทราบบทบาทหน้าที่ในพยาธิ ยีนใหม่ที่ยังไม่ทราบหน้าที่เป็นเป้าหมายที่สำคัญในการพัฒนาการรักษา เครื่องมือในระดับโมเลกุลเป็นสิ่งที่ต้องการเพื่อใช้ตรวจสอบความสำคัญของยีนใหม่ ๆ เหล่านี้ การแปลงพันธุ (transgenesis) มีบทบาทในการศึกษาความสำคัญของยีน โดยการศึกษาด้วยวิธีการเพิ่มและการลดบทบาทหน้าที่ของยีน เช่นการตรวจกรองผลของการกลายพันธุ์ (insertional mutagenesis screening) และการแทรกแซงการแสดงของยีนด้วยอาร์เอ็นเอ (RNA interference) ซึ่งบทความนี้จะเน้นการพัฒนาวิธีการ ระบบ และเครื่องมือเพื่อแสดงให้เห็นถึงปัญหาของการสร้างพยาธิซิสโตโซมแปลงพันธุ ซึ่งสามารถนำไปประยุกต์ใช้ในการตอบปัญหาพื้นฐานทางด้านสรีรวิทยา ความสัมพันธ์ระหว่างโฮสต์กับพยาธิ และการพัฒนาการรักษาด้วยวิธีใหม่
